# Supplementary material for: Growth impairment in children with atrophic autoimmune thyroiditis and pituitary hyperplasia
Source: Springer Nature journal article supplement (doi:10.1186/s13052-024-01641-w), 2024-04-23
Supplement: MOESM1 [file 27008296]

**Table. S1** Normal values of IGF-1 (ng/ml) for age and for sex

| <b>Age (years)</b> | <b>Male</b> | <b>Female</b> |
|--------------------|-------------|---------------|
| 0-1                | 12-94       | 15-89         |
| 1-3                | 15-105      | 26-129        |
| 4-6                | 37-158      | 53-217        |
| 7-9                | 68-255      | 87-324        |
| 10-11              | 90-368      | 118-413       |
| 12-14              | 108-463     | 139-466       |
| 15-17              | 15-500      | 154-483       |
| 18-20              | 134-449     | 154-448       |
